# Supplementary material for: Antagonistic Activity of Macrolepiota sp. CS185 against Post-Harvest Fungi of Fig Fruits (Ficus carica L.)
Source: MDPI journal article supplement (doi:10.3390/microbiolres15010025), 2024-03-07
Supplement: s1 [file s1]

1      Supplementary Information

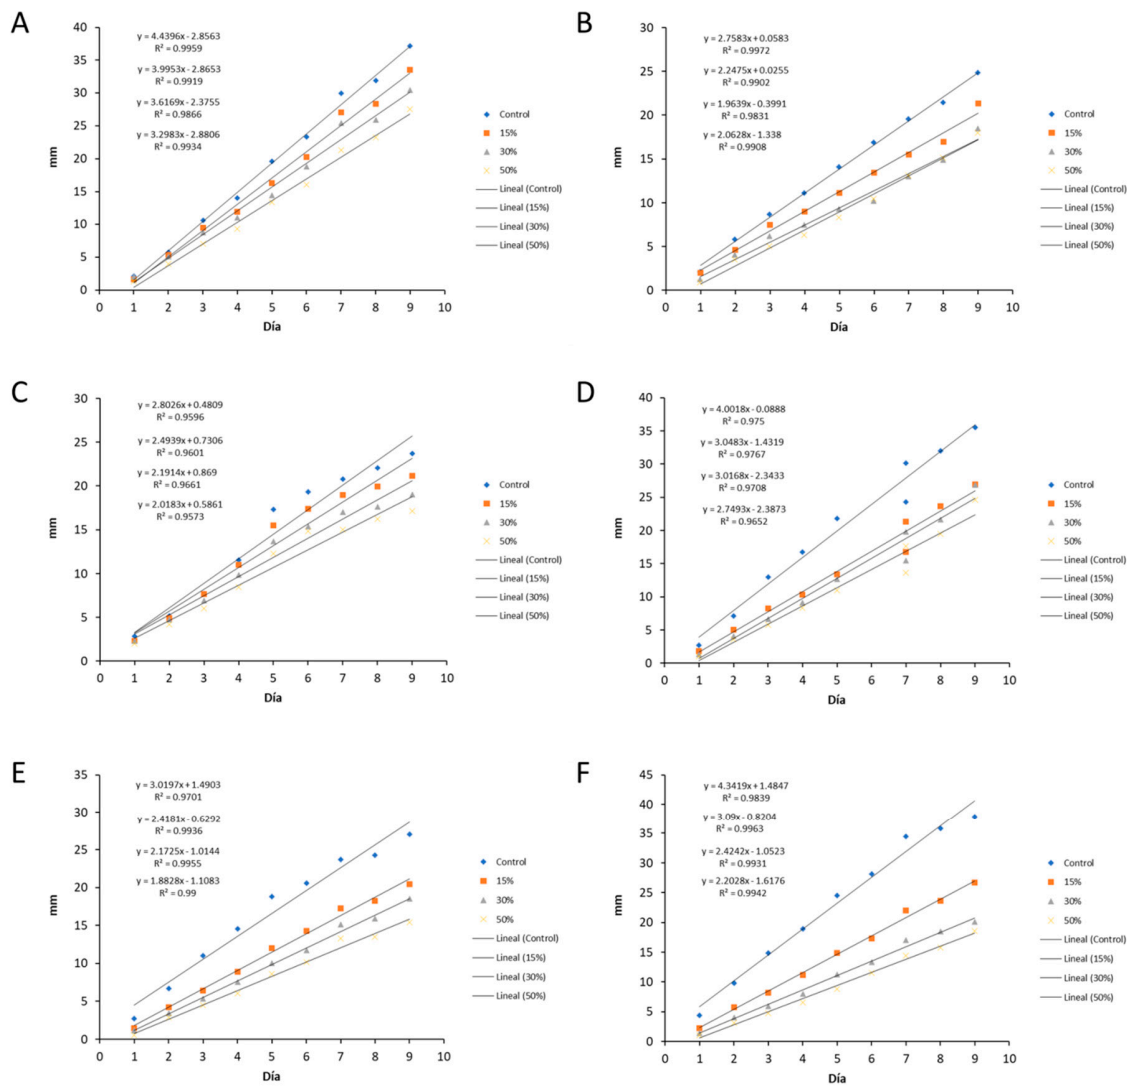

2

3      Figure S1. Growth curves with different concentrations of supernatant of *Macrolepiota* sp. CS185. A) *Alternaria alternta* 1, B) *A. alternta* 2, C) *A. alternta* 3, D) *A. alternta* 4, E) *Colletotrichum* sp. 1, F) *Colletotrichum* sp. 2.

6

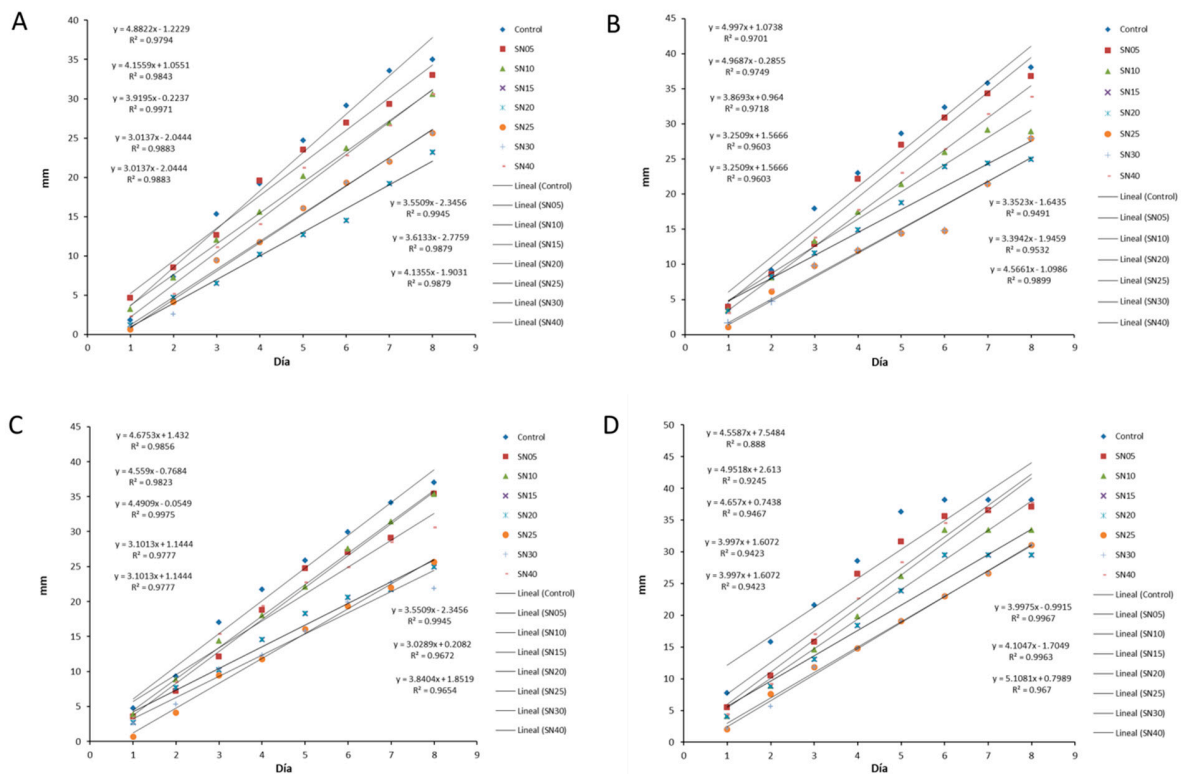

Figure S2. Mycelial growth rate. Where A) corresponds to *Alternaria alternata* 1, B *A. alternata* 2, C) corresponds to *Colletotrichum* sp. 1 and D) *Colletotrichum* sp. 2. The PDA medium was supplemented with supernatants from cultures of *Macrolepiota* sp. CS185 at 0, 5, 10, 15, 20, 25, 30 and 40 growth days in PDB

12 Table S1. Mean squares of variance analysis for the percentage of inhibition of supernatants of different  
 13 culture ages.

| S.V.                  | df  | MS        |
|-----------------------|-----|-----------|
| Treatment (Tt)        | 7   | 8353.04** |
| Tt > Repetition (Rep) | 32  | 36.88     |
| Time (T)              | 7   | 2303.63** |
| Tt x T                | 49  | 156.79**  |
| Tt > Rep x T          | 224 | 6.55      |
| Phytopathogenic (P)   | 3   | 1182.75** |
| P > T                 | 28  | 263.67**  |
| P > T                 | 28  | 69.15**   |
| P > Tt > T            | 217 | 56.22**   |
| Error                 | 768 | 9.51      |
| CV                    |     | 11.84     |

14 S.V.= source of variation; df=degree freedom; MS= mean square; Tt= treatment (supernatant age); Rep=  
 15 repetition; T= incubation time; P= post-harvest phytopathogenic fungi isolated from fruits of figs; CV=  
 16 coefficient of variation. \*\*,  $p \leq 0.01$ .
